# Supplementary material for: Comparisons between the distributions of dust and combustion aerosols in MERRA-2, FLEXPART and CALIPSO and implications for deposition freezing over wintertime Siberia
Source: Copernicus journal article supplement (doi:10.5194/acp-2022-124), 2022-03-18
Supplement: Supplementary file 1 [file acp-2022-124-supplement.pdf]

# **Supplement to “Comparisons between the distributions of dust and combustion aerosols in MERRA-2, FLEXPART and CALIPSO and implications for deposition freezing over wintertime Siberia”**

Lauren M. Zamora<sup>1,2</sup>, Ralph A. Kahn<sup>2</sup>, Nikolaos Evangeliou<sup>3</sup>, and Christine D. Groot Zwaafink<sup>3</sup>

5 <sup>1</sup>Earth System Science Interdisciplinary Center, University of Maryland, College Park, College Park, Maryland, U.S.A.

<sup>2</sup>NASA Goddard Space Flight Center, Greenbelt, Maryland, U.S.A.

<sup>3</sup>Norwegian Institute for Air Research (NILU), Kjeller, Norway

*Correspondence to:* Lauren M. Zamora ([lauren.m.zamora@nasa.gov](mailto:lauren.m.zamora@nasa.gov))

Winter (DJF), 4 to 8 km asl

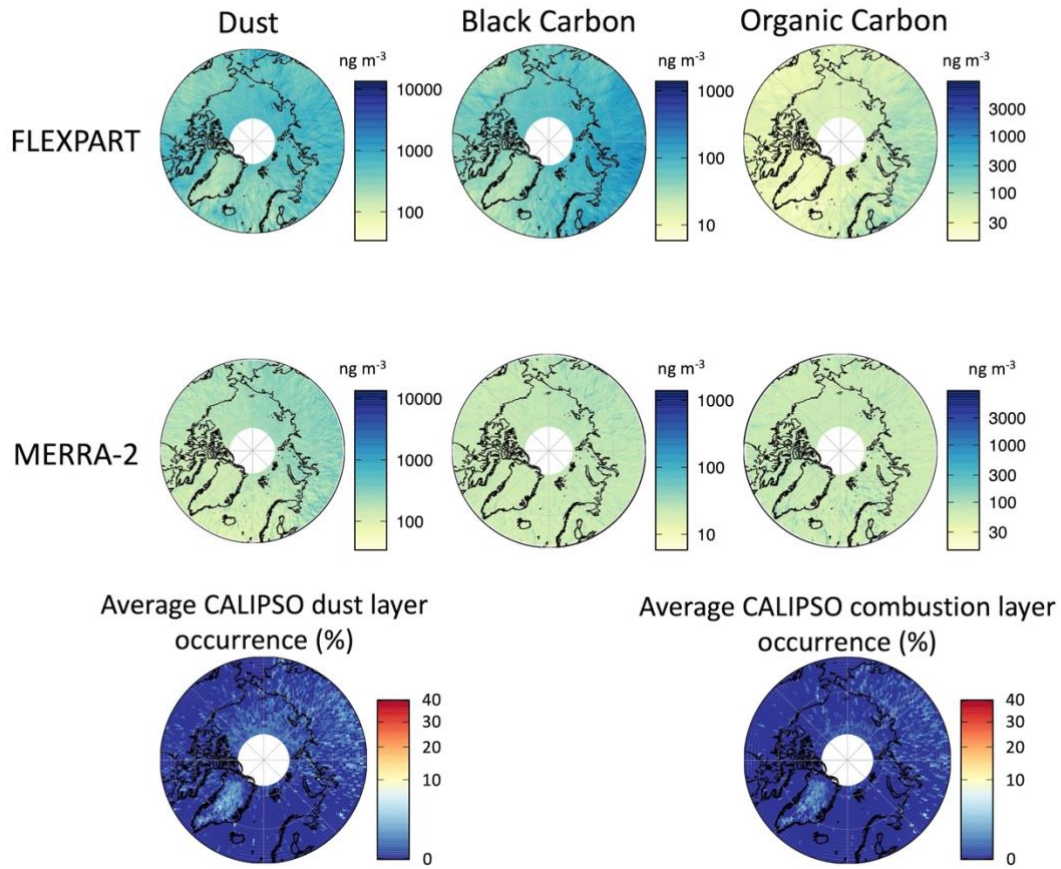

Figure S1: As in Figure 1, but for 4-8 km asl.

False negative rates (%), indicating where aerosols are underpredicted

False positive rates (%), indicating where aerosols are overpredicted

4 to 8 km

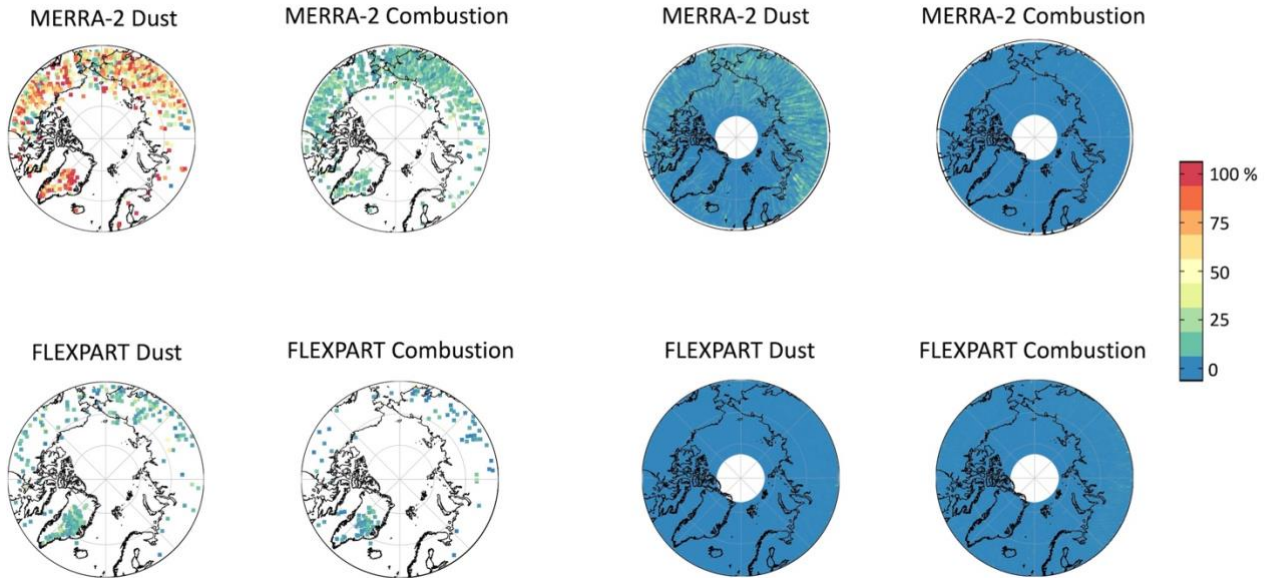

Figure S2: As in Figure 4, but for 4-8 km asl.
